# Supplementary material for: Oleanolic Acid Induces Differentiation of Neural Stem Cells to Neurons: An Involvement of Transcription Factor Nkx-2.5
Source: Stem Cells Int. 2015 Jul 9;2015:672312. doi: 10.1155/2015/672312 (PMC4512619; doi:10.1155/2015/672312)
Supplement: Supplementary file 1 — Table 1: Sequences of primers used in real-time PCR. Table 2: KEGG pathways enrichment for the differentially regulated genes by OA. Table 3: Gene ontology enrichment for the differentially regulated genes by OA. Table 4: 87 Genes predicted under the control of Nkx-2.5 transcriptional factor among the total differentially regulated genes. [file 672312.f1.zip]

Archive with 4 entries (4 files):
- ╨┬╜¿╬─╝■╝╨/Supplemental Table 1.doc
- ╨┬╜¿╬─╝■╝╨/Supplemental Table 2.doc
- ╨┬╜¿╬─╝■╝╨/Supplemental Table 3.doc
- ╨┬╜¿╬─╝■╝╨/Supplemental Table 4.doc
